# Supplementary material
Source: PubMed Central journal article supplement (PMC5071281)
Supplement: 11606_2016_3764_MOESM1_ESM.pdf [file 11606_2016_3764_MOESM1_ESM.pdf]

**ONLINE SUPPLEMENTARY APPENDIX:**

| <b>Content</b>                                                                                                                                                                                   | <b>Location</b> |
|--------------------------------------------------------------------------------------------------------------------------------------------------------------------------------------------------|-----------------|
| Hospitals participating in the Hospital Medicine Reengineering Network (HOMERuN)                                                                                                                 | Page 2          |
| Appendix Table 1: PCP, Discharging Physician, and Readmitting Physician Perceptions Regarding Potential Ways to Prevent Readmission Using a Higher Threshold to Define Endorsement of a Strategy | Page 3          |
| Appendix Table 2: PCP, Discharging Physician, and Readmitting Physician Perceptions Regarding Factors Contributing to Readmission in Subgroup of Patients with Complete Survey Data              | Page 4          |
| Appendix Table 3: PCP, Discharging Physician, and Readmitting Physician Perceptions Regarding Potential Ways to Prevent Readmission in Subgroup of Patients with Complete Survey Data            | Page 5          |
| PCP survey                                                                                                                                                                                       | Pages 6-9       |
| Discharging physician survey                                                                                                                                                                     | Pages 10-13     |
| Readmitting physician survey                                                                                                                                                                     | Pages 14-16     |

**1) Hospitals participating in the Hospital Medicine Reengineering Network (HOMERuN)**

Hospitals participating in the Hospital Medicine Reengineering Network (HOMERuN):

Brigham and Women's Hospital, Boston MA

Beth Israel Deaconess Medical Center, Boston MA

Baystate Medical Center, Springfield MA

Hospital of the University of Pennsylvania, Philadelphia PA

Christiana Care Health System, Wilmington DE

Vanderbilt University Medical Center, Nashville TN

University of Michigan Health System, Ann Arbor MI

University of Chicago Hospitals, Chicago IL

Northwestern University Hospital, Chicago IL

Harborview Hospital, Seattle WA

California-Pacific Medical Center San Francisco CA

San Francisco General Hospital, San Francisco CA

Moffitt-Long Hospital, San Francisco CA

**Appendix Table 1. PCP, Discharging Physician, and Readmitting Physician Perceptions Regarding Potential Strategies to Prevent Readmission Using a Higher Threshold to Define Endorsement of a Strategy**

|                                                                                    | PCP<br>n = 305 |      | Disch<br>n = 642 |      | Admit<br>n = 694 |      | Concordance               |                           |                             |
|------------------------------------------------------------------------------------|----------------|------|------------------|------|------------------|------|---------------------------|---------------------------|-----------------------------|
|                                                                                    | n              | %*   | n                | %*   | n                | %*   | PCP-Disch<br>n = 190<br>κ | PCP-Admit<br>n = 212<br>κ | Admit-Disch<br>n = 440<br>κ |
| Improved self-management plan at discharge                                         | 66             | (22) | 98               | (15) | 109              | (16) | 0.03                      | 0.21                      | 0.09                        |
| Greater engagement of home and community supports                                  | 72             | (24) | 93               | (14) | 110              | (16) | 0.03                      | 0.12                      | 0.11                        |
| Provision of resources to manage care and symptoms after discharge                 | 58             | (19) | 89               | (14) | 114              | (16) | -0.05                     | 0.15                      | 0.05                        |
| Improved discharge planning                                                        | 51             | (17) | 38               | (6)  | 66               | (10) | 0.03                      | 0.11                      | 0.16                        |
| Improved coordination of care between inpatient and outpatient providers           | 49             | (16) | 53               | (8)  | 74               | (11) | 0.02                      | 0.03                      | 0.03                        |
| More complete communication of information                                         | 25             | (8)  | 21               | (3)  | 27               | (4)  | -0.06                     | 0.02                      | 0.10                        |
| Improved attention to medication safety                                            | 29             | (10) | 21               | (3)  | 39               | (6)  | 0.06                      | 0.22                      | 0.12                        |
| Improved clarity, timeliness, or availability of information provided at discharge | 30             | (10) | 9                | (1)  | 22               | (3)  | 0.16                      | -0.07                     | -0.01                       |
| Average κ                                                                          | N/A            |      | N/A              |      | N/A              |      | 0.03                      | 0.10                      | 0.08                        |

Abbreviations: Disch = discharging physician, Admit = readmitting physician.

\* n represents the number reporting "slightly more than 50-50," "strongly probable," or "nearly certain."

**Appendix Table 2. PCP, Discharging Physician, and Readmitting Physician Perceptions Regarding Factors Contributing to Readmission in Subgroup of Patients with Complete Survey Data (n=155)\***

|                                                                                      | PCP       |             | Disch     |             | Admit     |             | Concordance    |                |                  |
|--------------------------------------------------------------------------------------|-----------|-------------|-----------|-------------|-----------|-------------|----------------|----------------|------------------|
|                                                                                      | n         | %           | n         | %           | n         | %           | PCP-Disch<br>κ | PCP-Admit<br>κ | Admit-Disch<br>κ |
| <b>Patient Understanding and Ability to Self-Manage</b>                              | <b>92</b> | <b>(59)</b> | <b>81</b> | <b>(52)</b> | <b>83</b> | <b>(54)</b> | <b>0.39</b>    | <b>0.39</b>    | <b>0.38</b>      |
| Patient or caregiver inability to manage his/her symptoms                            | 66        | (43)        | 60        | (39)        | 60        | (39)        |                |                |                  |
| Patient or caregiver inability to otherwise care/provide care                        | 38        | (25)        | 30        | (19)        | 32        | (21)        |                |                |                  |
| Patient or caregiver inability to manage his/her medications                         | 22        | (14)        | 27        | (17)        | 23        | (15)        |                |                |                  |
| Patient or caregiver lack of understanding of the post-discharge plan                | 12        | (8)         | 10        | (6)         | 15        | (10)        |                |                |                  |
| Insufficient or ineffective patient or caregiver education                           | 10        | (6)         | 4         | (3)         | 10        | (6)         |                |                |                  |
| <b>Continuity of Care and Provider Communication</b>                                 | <b>62</b> | <b>(40)</b> | <b>32</b> | <b>(21)</b> | <b>37</b> | <b>(24)</b> | <b>0.09</b>    | <b>0.06</b>    | <b>0.05</b>      |
| Inability of the patient to keep the follow-up appointment or follow-up studies      | 28        | (18)        | 12        | (8)         | 13        | (8)         |                |                |                  |
| Insufficient communication with post-acute care providers re:post-discharge plan     | 22        | (14)        | 3         | (2)         | 5         | (3)         |                |                |                  |
| Insufficient monitoring of the patient's condition(s) after discharge                | 18        | (12)        | 11        | (7)         | 21        | (14)        |                |                |                  |
| Failure to obtain an appropriately timely follow-up appointment or follow-up studies | 7         | (5)         | 12        | (8)         | 8         | (5)         |                |                |                  |
| Discharge summary unavailable in timely manner                                       | 6         | (4)         | 1         | (1)         | 0         | (0)         |                |                |                  |
| Discharge summary poorly written or with missing or erroneous information            | 4         | (3)         | 1         | (1)         | 0         | (0)         |                |                |                  |
| <b>Problems with Index (Initial) Admission</b>                                       | <b>36</b> | <b>(23)</b> | <b>20</b> | <b>(13)</b> | <b>32</b> | <b>(21)</b> | <b>0.23</b>    | <b>0.02</b>    | <b>0.13</b>      |
| Discharged from the hospital too soon                                                | 17        | (11)        | 9         | (6)         | 10        | (6)         |                |                |                  |
| Inappropriate/inadequate treatment of the patient                                    | 16        | (10)        | 4         | (3)         | 13        | (8)         |                |                |                  |
| No or inadequate end of life or goals of care planning                               | 6         | (4)         | 5         | (3)         | 7         | (5)         |                |                |                  |
| Misdiagnosis                                                                         | 4         | (3)         | 4         | (3)         | 8         | (5)         |                |                |                  |
| Absent, erroneous, or incomplete medication reconciliation                           | 2         | (1)         | 0         | (0)         | 0         | (0)         |                |                |                  |
| <b>Social Supports</b>                                                               | <b>35</b> | <b>(23)</b> | <b>24</b> | <b>(15)</b> | <b>31</b> | <b>(20)</b> | <b>0.23</b>    | <b>0.15</b>    | <b>0.32</b>      |
| Inadequate support for non-clinical issues                                           | 18        | (12)        | 15        | (10)        | 13        | (8)         |                |                |                  |
| Inadequate home services or equipment after discharge                                | 12        | (8)         | 8         | (5)         | 14        | (9)         |                |                |                  |
| Inappropriate choice of discharge destination                                        | 10        | (6)         | 8         | (5)         | 8         | (5)         |                |                |                  |
| <b>Problems with Triage after Index (Initial) Discharge</b>                          | <b>8</b>  | <b>(5)</b>  | <b>11</b> | <b>(7)</b>  | <b>10</b> | <b>(6)</b>  | <b>0.16</b>    | <b>0.41</b>    | <b>0.34</b>      |
| Patient inappropriately went/sent to ED or inappropriately readmitted from ED        | 8         | (5)         | 11        | (7)         | 10        | (6)         |                |                |                  |
| <b>Average κ</b>                                                                     | N/A       |             | N/A       |             | N/A       |             | <b>0.22</b>    | <b>0.21</b>    | <b>0.24</b>      |

Abbreviations: Disch = discharging physician, Admit = readmitting physician.

\*Section headings represent major categories, reflecting selection of at least one individual sub-item.

**Appendix Table 3. PCP, Discharging Physician, and Readmitting Physician Perceptions Regarding Potential Strategies to Prevent Readmission in Subgroup of Patients with Complete Survey Data (n=138)\***

|                                                                                    | PCP |      | Disch |      | Admit |      | Concordance    |                |                  |
|------------------------------------------------------------------------------------|-----|------|-------|------|-------|------|----------------|----------------|------------------|
|                                                                                    | n   | %*   | n     | %*   | n     | %*   | PCP-Disch<br>κ | PCP-Admit<br>κ | Admit-Disch<br>κ |
| Improved self-management plan at discharge                                         | 82  | (59) | 61    | (44) | 75    | (54) | 0.22           | 0.19           | 0.23             |
| Greater engagement of home and community supports                                  | 78  | (57) | 57    | (41) | 61    | (44) | 0.08           | 0.21           | 0.20             |
| Provision of resources to manage care and symptoms after discharge                 | 79  | (57) | 59    | (43) | 69    | (50) | 0.26           | 0.30           | 0.13             |
| Improved discharge planning                                                        | 58  | (42) | 39    | (28) | 45    | (33) | 0.08           | 0.03           | 0.08             |
| Improved coordination of care between inpatient and outpatient providers           | 48  | (35) | 36    | (26) | 47    | (34) | 0.12           | 0.05           | 0.06             |
| More complete communication of information                                         | 50  | (36) | 35    | (25) | 38    | (28) | 0.04           | -0.12          | 0.05             |
| Improved attention to medication safety                                            | 43  | (31) | 20    | (14) | 30    | (22) | 0.07           | 0.17           | 0.13             |
| Improved clarity, timeliness, or availability of information provided at discharge | 44  | (32) | 28    | (20) | 25    | (18) | 0.15           | 0.04           | 0.04             |
| Average κ                                                                          | N/A |      | N/A   |      | N/A   |      | 0.13           | 0.11           | 0.11             |

Abbreviations: Disch = discharging physician, Admit = readmitting physician.

\*n represents the number reporting anything other than "no probability" of preventing readmission (i.e. slightly probable, slightly less than 50-50, slightly more than 50-50, strongly probable, nearly certain).

# PCP Survey

## HOMERUN Primary Care Provider Survey

Dear Reviewer,

Thank you for taking this survey and being a part of the HOMERUN study. Please refer to the email containing the link to this survey to remind you of the patient to whom it refers. If you have any questions about the survey, please do not hesitate to email us.

The HOMERUN Transitions of Care Research Team

---

---

- 1) Were you aware that your patient was readmitted to the hospital on the date indicated?  Yes  No
- 2) Did you have any contact with the patient, family/caregivers, between the previous admission and this readmission?  
 Office visit  Phone call  Email  No contact with patient between admissions

---

---

**In your opinion, which of the following factors may have contributed to the readmission?  
(CHECK ALL THAT APPLY)**

- 3) PATIENT UNDERSTANDING AND ABILITY TO SELF-MANAGE
- Patient or caregiver lack of understanding of the post-discharge plan
  - Patient or caregiver inability to manage his/her medications
  - Patient or caregiver inability to manage his/her symptoms
  - Patient inability to otherwise care for him/herself or caregiver's inability to otherwise provide care
  - Insufficient or ineffective patient or caregiver education
- 4) CONTINUITY OF CARE AND PROVIDER COMMUNICATION
- Failure to involve you sufficiently in the development of the post-discharge plan
  - Discharge summary unavailable in a timely manner
  - Discharge summary poorly written or with missing or erroneous information
  - Lack of verbal communication with you re: follow-up plans
  - Failure to obtain an appropriately timed follow-up appointment or follow-up studies
  - Inability of the patient to keep the follow-up appointment or follow-up studies
  - Insufficient monitoring of the patient's condition(s) after discharge
- 5) SOCIAL SUPPORTS
- Inappropriate choice of discharge destination
  - Inadequate support for non-clinical issues (such as food, heat, transportation, or ability to afford medications)
  - Inadequate home services or equipment after discharge
- 6) PROBLEMS WITH INDEX (INITIAL) ADMISSION
- Misdiagnosis made during the index admission
  - Inappropriate/inadequate treatment of the patient during the index admission
  - Discharged from the hospital too soon after index admission
  - Absent, erroneous, or incomplete medication reconciliation
  - No or inadequate end of life or goals of care planning
- 7) PROBLEMS WITH TRIAGE AFTER INDEX (INITIAL) DISCHARGE
- Patient inappropriately went/sent to ED or inappropriately readmitted from ED

---

---

**How probable do you think each of these potential types of interventions might have been in preventing this readmission?**

- 8) More complete communication of information (e.g. tests or appointments to be completed after discharge)
- No probability
  - Slightly probable
  - Slightly less than 50-50
  - Slightly more than 50-50
  - Strongly probable
  - Nearly certain
- 9) Improved clarity, timeliness or availability of information provided at discharge
- No probability
  - Slightly probable
  - Slightly less than 50-50
  - Slightly more than 50-50
  - Strongly probable
  - Nearly certain
- 10) Improved self-management plan at discharge (e.g. patient-centered discharge instructions, transition coaches)
- No probability
  - Slightly probable
  - Slightly less than 50-50
  - Slightly more than 50-50
  - Strongly probable
  - Nearly certain
- 11) Provision of resources to manage care and symptoms after discharge (e.g. telephone monitoring of body weight)
- No probability
  - Slightly probable
  - Slightly less than 50-50
  - Slightly more than 50-50
  - Strongly probable
  - Nearly certain
- 12) Greater engagement of home and community supports (e.g. enlisting help of community agencies)
- No probability
  - Slightly probable
  - Slightly less than 50-50
  - Slightly more than 50-50
  - Strongly probable
  - Nearly certain
- 13) Improved discharge planning (e.g. appointments scheduled in advance)
- No probability
  - Slightly probable
  - Slightly less than 50-50
  - Slightly more than 50-50
  - Strongly probable
  - Nearly certain



14) Improved coordination of care between inpatient and outpatient providers (e.g. shared medical records)

- No probability
- Slightly probable
- Slightly less than 50-50
- Slightly more than 50-50
- Strongly probable
- Nearly certain

15) Improved attention to medication safety (e.g. medication reconciliation)

- No probability
- Slightly probable
- Slightly less than 50-50
- Slightly more than 50-50
- Strongly probable
- Nearly certain

16) In addition to the previous categories, is there anything else you think contributed to this readmission?

17) Would you be surprised if the patient died within the next 6-12 months?

- Yes
- No

# Discharging Physician Survey

HOMERUN Discharging Physician Survey

Dear Reviewer,

Thank you for taking this survey and being a part of the HOMERUN study. Please refer to the email containing the link to this survey to remind you of the patient to whom it refers. Feel free to talk about the case with your own residents or the discharging case coordinator or social worker. If you have any questions about the survey, please do not hesitate to email us.

The HOMERUN Transitions of Care Research Team

---

---

- 1) Were you aware that your patient was readmitted to the hospital on the date indicated?  Yes  No

---

---

**In your opinion, which of the following factors might have contributed to the readmission?  
(CHECK ALL THAT APPLY)**

2) PATIENT UNDERSTANDING AND ABILITY TO SELF-MANAGE

- Patient or caregiver lack of understanding of the post-discharge plan
- Patient or caregiver inability to manage his/her medications
- Patient or caregiver inability to manage his/her symptoms
- Patient inability to otherwise care for him/herself or caregiver's inability to otherwise provide care
- Insufficient or ineffective patient or caregiver education

3) CONTINUITY OF CARE AND PROVIDER COMMUNICATION

- Insufficient communication with post-acute care providers re: post-discharge plan
- Discharge summary unavailable in timely manner
- Discharge summary poorly written or with missing or erroneous information
- Failure to obtain an appropriately timely follow-up appointment or follow-up studies
- Inability of patient to keep the follow-up appointment or follow-up studies
- Insufficient monitoring of the patient's condition(s) after discharge

4) SOCIAL SUPPORTS

- Inappropriate choice of discharge destination
- Inadequate support for non-clinical issues (such as food, heat, transportation, or ability to afford medications)
- Inadequate home services or equipment after discharge

5) PROBLEMS WITH INDEX (INITIAL) ADMISSION

- Misdiagnosis made during the index admission
- Inappropriate/inadequate treatment of the patient during the index admission
- Discharged from the hospital too soon after index admission
- Absent, erroneous, or incomplete medication reconciliation
- No or inadequate end of life or goals of care planning

6) PROBLEMS WITH TRIAGE AFTER INDEX (INITIAL) DISCHARGE

- Patient inappropriately went/sent to ED or inappropriately readmitted from ED

---

---

**How probable do you think each of these potential types of interventions might have been in preventing this readmission?**

- 7) More complete communication of information (e.g. tests or appointments to be completed after discharge)
- No probability
  - Slightly probable
  - Slightly less than 50-50
  - Slightly more than 50-50
  - Strongly probable
  - Nearly certain
- 8) Improved clarity, timeliness or availability of information provided at discharge
- No probability
  - Slightly probable
  - Slightly less than 50-50
  - Slightly more than 50-50
  - Strongly probable
  - Nearly certain
- 9) Improved self-management plan at discharge (e.g. patient-centered discharge instructions, transition coaches)
- No probability
  - Slightly probable
  - Slightly less than 50-50
  - Slightly more than 50-50
  - Strongly probable
  - Nearly certain
- 10) Provision of resources to manage care and symptoms after discharge (e.g. telephone monitoring of body weight)
- No probability
  - Slightly probable
  - Slightly less than 50-50
  - Slightly more than 50-50
  - Strongly probable
  - Nearly certain
- 11) Greater engagement of home and community supports (e.g. enlisting help of community agencies)
- No probability
  - Slightly probable
  - Slightly less than 50-50
  - Slightly more than 50-50
  - Strongly probable
  - Nearly certain
- 12) Improved discharge planning (e.g. appointments scheduled in advance)
- No probability
  - Slightly probable
  - Slightly less than 50-50
  - Slightly more than 50-50
  - Strongly probable
  - Nearly certain

13) Improved coordination of care between inpatient and outpatient providers (e.g. shared medical records)

- No probability
- Slightly probable
- Slightly less than 50-50
- Slightly more than 50-50
- Strongly probable
- Nearly certain

14) Improved attention to medication safety (e.g. medication reconciliation)

- No probability
- Slightly probable
- Slightly less than 50-50
- Slightly more than 50-50
- Strongly probable
- Nearly certain

15) In addition to the previous categories, is there anything else you think contributed to this readmission?

16) Would you be surprised if the patient died within the next 6-12 months?  Yes  No

17) Please list all the people who helped fill out this form (e.g. Attending, Resident, Intern, Case Manager, etc):

# Admitting Physician Survey

HOMERUN Admitting Physician Survey

Dear Reviewer,

Thank you for taking this survey and being a part of the HOMERUN study. Please refer to the email containing the link to this survey to remind you of the patient to whom it refers. Feel free to talk about the case with your own residents or the discharging case coordinator or social worker. If you have any questions about the survey, please do not hesitate to email us.

The HOMERUN Transitions of Care Research Team

---



---

**In your opinion, which of the following factors might have contributed to this readmission?  
(CHECK ALL THAT APPLY)**

- 1) PATIENT UNDERSTANDING AND ABILITY TO SELF-MANAGE
  - Patient or caregiver lack of understanding of the post-discharge plan
  - Patient or caregiver inability to manage his/her medications
  - Patient or caregiver inability to manage his/her symptoms
  - Patient inability to otherwise care for him/herself or caregiver's inability to otherwise provide care
  - Insufficient or ineffective patient or caregiver education
- 2) CONTINUITY OF CARE AND PROVIDER COMMUNICATION
  - Insufficient communication with post-acute care provider(s) re: post-discharge plan
  - Discharge summary unavailable in a timely manner
  - Discharge summary poorly written or with missing or erroneous information
  - Failure to obtain an appropriately timely follow-up appointment or follow-up studies
  - Inability of the patient to keep the follow-up appointment or follow-up studies
  - Insufficient monitoring of the patient's condition(s) after discharge
- 3) SOCIAL SUPPORTS
  - Inappropriate choice of discharge destination
  - Inadequate support for non-clinical issues (such as food, heat, transportation, or inability to afford medications)
  - Inadequate home services or equipment after discharge
- 4) PROBLEMS DURING INDEX (INITIAL) ADMISSION
  - Misdiagnosis made during the index admission
  - Inappropriate/inadequate treatment of the patient during the index admission
  - Discharged from the hospital too soon after index admission
  - Absent, erroneous, or incomplete medication reconciliation
  - No or inadequate end of life or goals of care planning
- 5) PROBLEMS WITH TRIAGE AFTER INDEX (INITIAL) DISCHARGE
  - Patient inappropriately went/sent to ED or inappropriately readmitted from ED

---

---

**How probable do you think each of these potential types of interventions might have been in preventing this readmission?**

- 6) More complete communication of information (e.g. tests or appointments to be completed after discharge)
- No probability
  - Slightly probable
  - Slightly less than 50-50
  - Slightly more than 50-50
  - Strongly probable
  - Nearly certain
- 7) Improved clarity, timeliness or availability of information provided at discharge
- No probability
  - Slightly probable
  - Slightly less than 50-50
  - Slightly more than 50-50
  - Strongly probable
  - Nearly certain
- 8) Improved self-management plan at discharge (e.g. patient-centered discharge instructions, transition coaches)
- No probability
  - Slightly probable
  - Slightly less than 50-50
  - Slightly more than 50-50
  - Strongly probable
  - Nearly certain
- 9) Provision of resources to manage care and symptoms after discharge (e.g. telephone monitoring of body weight)
- No probability
  - Slightly probable
  - Slightly less than 50-50
  - Slightly more than 50-50
  - Strongly probable
  - Nearly certain
- 10) Greater engagement of home and community supports (e.g. enlisting help of community agencies)
- No probability
  - Slightly probable
  - Slightly less than 50-50
  - Slightly more than 50-50
  - Strongly probable
  - Nearly certain
- 11) Improved discharge planning (e.g. appointments scheduled in advance)
- No probability
  - Slightly probable
  - Slightly less than 50-50
  - Slightly more than 50-50
  - Strongly probable
  - Nearly certain

12) Improved coordination of care between inpatient and outpatient providers (e.g. shared medical records)

- No probability
- Slightly probable
- Slightly less than 50-50
- Slightly more than 50-50
- Strongly probable
- Nearly certain

13) Improved attention to medication safety (e.g. medication reconciliation)

- No probability
- Slightly probable
- Slightly less than 50-50
- Slightly more than 50-50
- Strongly probable
- Nearly certain

14) In addition to the previous categories, is there anything else you think contributed to this readmission?

15) Would you be surprised if the patient died within the next 6-12 months?

- Yes
- No

16) Please list all the people who helped fill out this form (e.g. Attending, Resident, Intern, Case Manager, etc.)
